# Supplementary material for: Dosage compensation in Bombyx mori is achieved by partial repression of both Z chromosomes in males
Source: PubMed Central journal article supplement — Proc Natl Acad Sci U S A. 2022 Mar 3;119(10):e2113374119. doi: 10.1073/pnas.2113374119 (PMC8915793; doi:10.1073/pnas.2113374119), 2022-03-03
Supplement: pnas.2113374119.sapp.pdf [file pnas.2113374119.sapp.pdf]

## Supplemental Figures and Legends

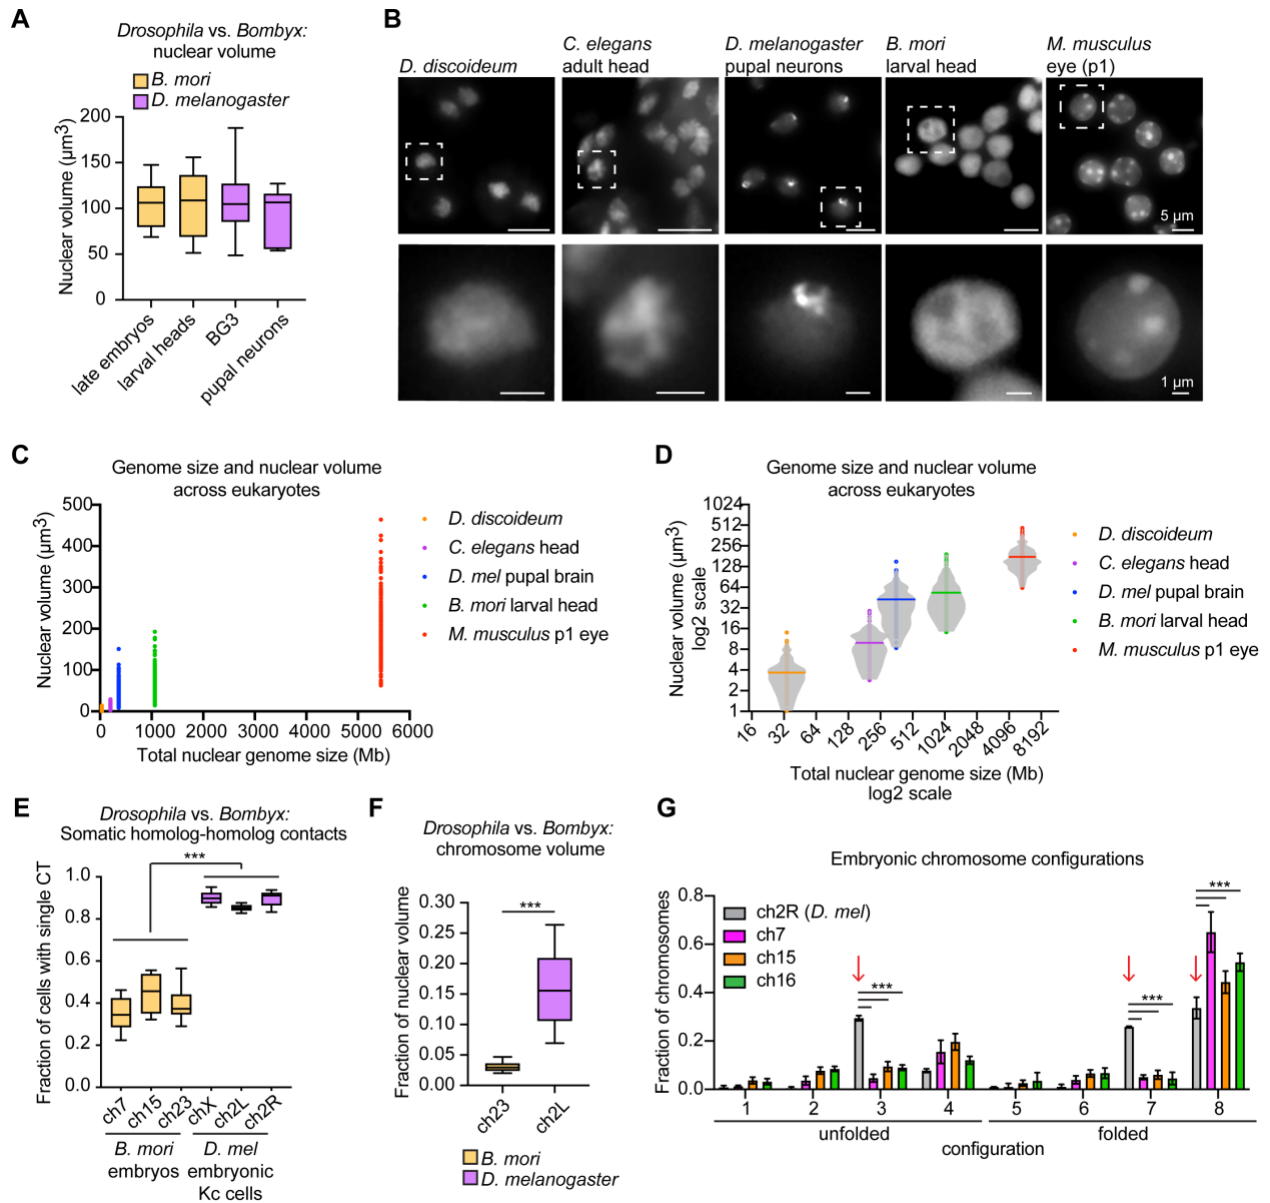

**Figure S1. *B. mori* nuclei and chromosomes are relatively more compact than their *D. melanogaster* counterparts.**

A) Tukey box and whiskers plot showing the average nuclear volume of *B. mori* diploid cells from late embryos and larval heads (orange) and *D. melanogaster* BG3 cultured cells and pupal neurons (purple). Plots show the averages from 7-15 biological replicates.

- B) DAPI stained nuclei. The source species and tissues are indicated above. Dashed squares indicated the zoomed panel below. Species included: *Dictyostelium discoideum* (commonly known as Dicty), *Caenorhabditis elegans*, *Drosophila melanogaster* (*D. mel*), *Bombyx mori*, and *Mus musculus*.
- C-D) Genomic size versus nuclear volume for the species shown in B. In D, each dot represents a single nucleus. Data were gathered from three biological replicates. N= 288 (fly), 317 (mouse), 268 (moth), 209 (worm), 285 (Dicty).
- E) Tukey box and whiskers plot showing the average fraction of cells harboring a single contiguous CT for three representative chromosomes in *B. mori* embryos (orange) and 3 representative chromosome arms in *D. melanogaster* embryonic Kc cells (purple).  
\*\*\* $p < 0.0001$ ; Mann-Whitney Test for all pairwise comparisons.
- F) Tukey box and whiskers plot showing the average size (fraction of nuclear volume) for *B. mori* chromosome 23 (orange) from embryonic cells, and *D. melanogaster* ch2L (purple) from BG3 cells. Data shown represent a single biological replicate (n = 1500 cells from *B. mori* and n = 2017 cells from *D. melanogaster*), but similar results were found in 3-5 additional replicates. \*\*\* $p < 0.0001$ ; Mann-Whitney Test.
- G) Quantification of folding for *B. mori* embryonic ch7 (magenta), 15 (orange), and 16 (green), and *D. melanogaster* ch2R from embryonic Kc cells (gray). Red arrows indicate configurations enriched in Kc cells (3, 7, 8). Bars show the average of at least three biological replicates with at least 100 cells analyzed from each replicate. Error bars show standard deviation. \*\*\* $p < 0.0001$ ; Multiple t-tests.

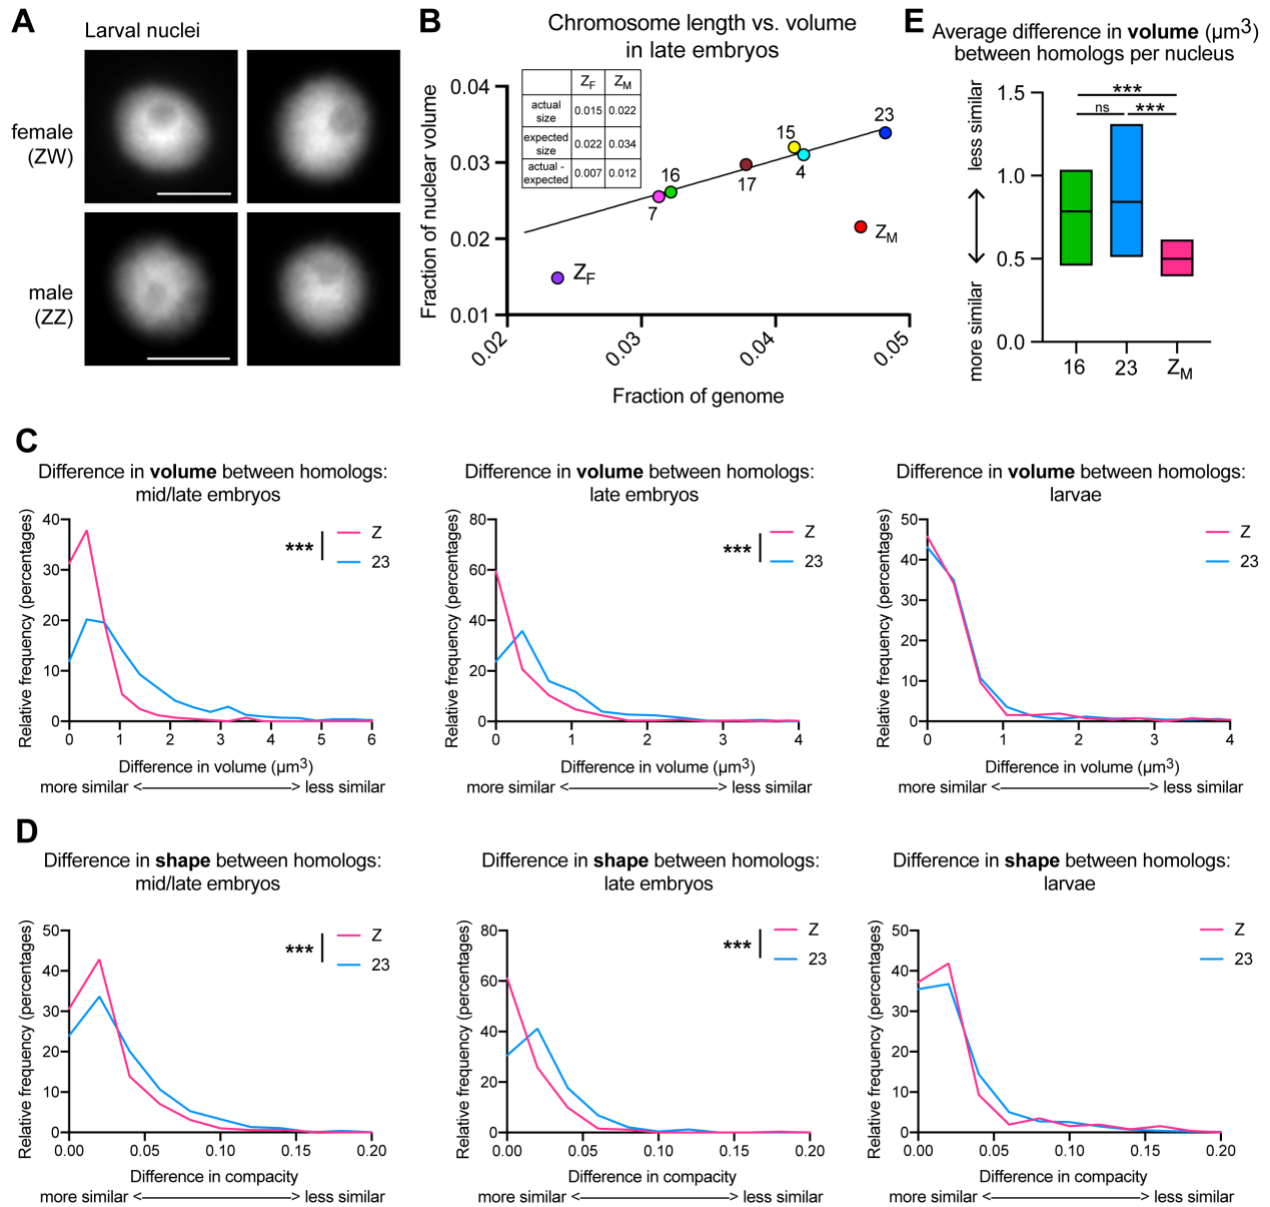

**Figure S2. Both male chZ homologs are more similar in size and shape than the ch23 homologs.**

- A) DAPI staining of representative larval nuclei from *B. mori* females (top) and males (bottom). Scale bar = 2.5  $\mu\text{m}$ .
- B) Dot plot showing chromosome genomic length as a fraction of total genome size (X-axis) versus CT volume as a fraction of nuclear volume (Y-axis).  $R^2 = 0.966$  excluding chZ. Data shown are from late embryos. Frequency histograms showing the difference in volume ( $\mu\text{m}^3$ ) between homologs for chZ (pink) and ch23 (blue) in male mid/late embryos (left),

late embryos (middle), and larvae (right). Data represent a single biological replicate.

\*\*\* $p < 0.0001$ ; Mann-Whitney Test.

- C) Frequency histograms showing the difference in shape (compactness) between homologs for chZ (pink) and ch23 (blue) in male mid/late embryos (left), late embryos (middle), and larvae (right). Data represent a single biological replicate. \*\*\* $p < 0.0001$ ; Mann-Whitney Test.
- D) Quantification of interhomolog differences in volume ( $\mu\text{m}^3$ ) in for ch16 (green), ch23 (blue), and chZ (pink) in male mid/late embryos. Mid-line = mean. Statistics = Mann-Whitney Test. \*\*\*  $p < 0.0001$ .

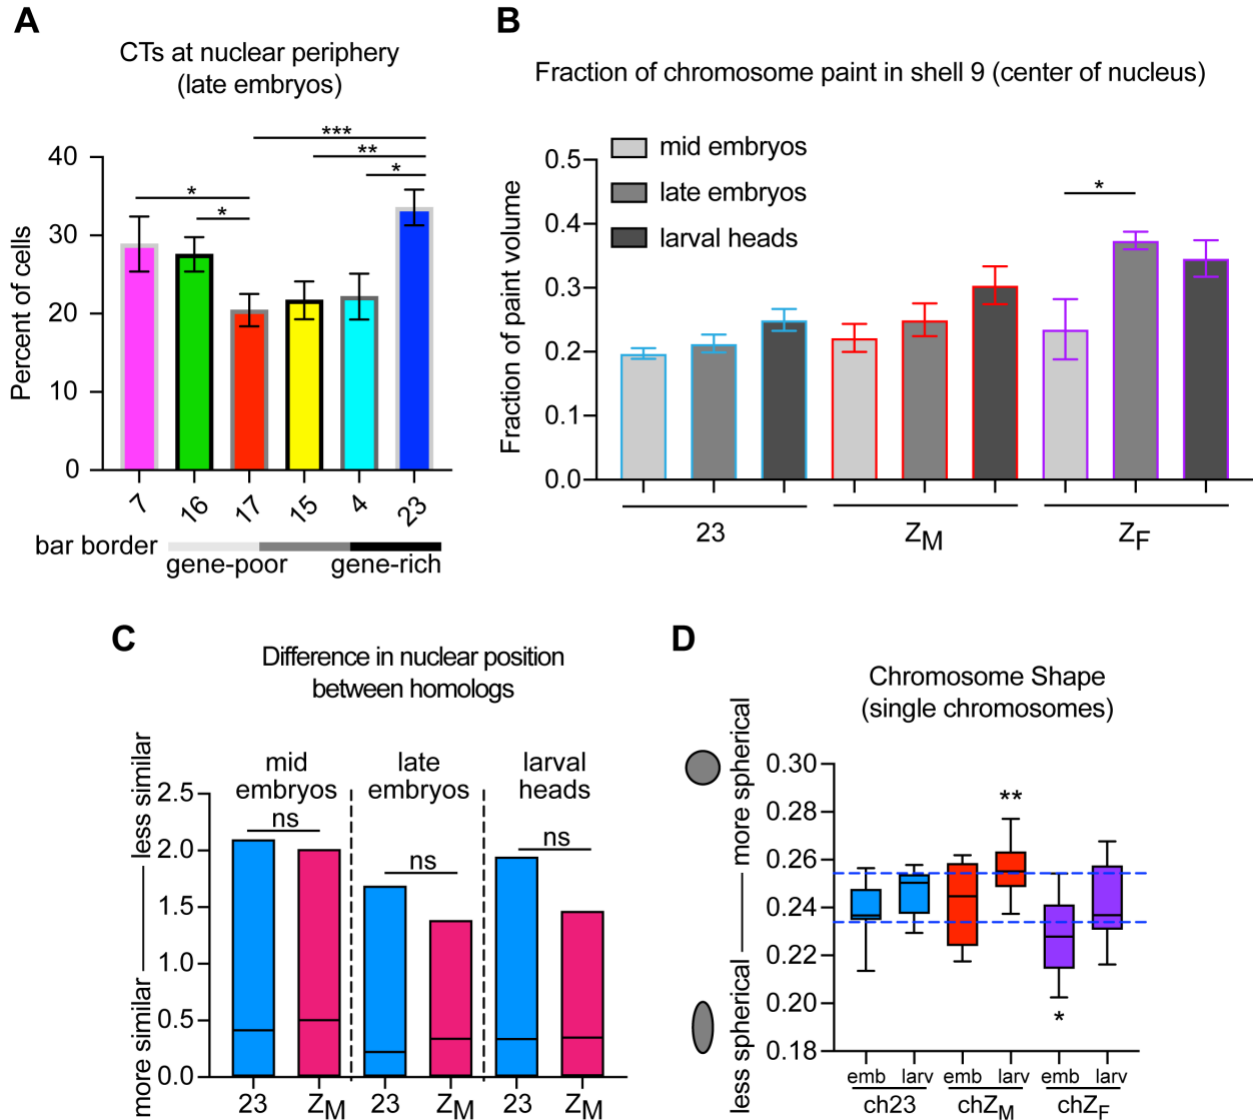

**Figure S3. Female chZ is reposition toward the nuclear center and is upregulated in late embryos.**

A) Quantification of fraction of autosomes at nuclear periphery in late embryos (defined as having any volume in shells 1-3 of a shell analysis). Bars show average of biological replicates. Error bars show standard error of the mean. Statistics = unpaired t-tests. \* $p = 0.01 - 0.05$ , \*\* $p = 0.001 - 0.005$ , \*\*\* $p < 0.001$ . Gene density of chromosomes is indicated by bar outlines, with darker outlines indicating higher gene density.

- B) Quantification of the fraction of CTs in the nuclear center (defined as having any volume in shell 9 of a shell analysis). Bars show the average between biological replicates. Error bars show standard error of the mean. \* $p=0.05$ ; unpaired t-test.
- C) Quantification of interhomolog differences in nuclear position as measured by the distance from the nuclear edge ( $\mu\text{m}$ ) for ch23 (blue) or chZ (pink) in male embryos or larvae. Mid-line = mean. Statistics = unpaired t-tests.
- D) Tukey box and whisker plot showing quantification of chromosome shape (compactness; Y-axis) for individual chromosomes at the indicated time points. Midline = median. Statistics = Welch's T-tests. \* $p < 0.05$ , \*\* $p < 0.01$ . Blue dashed lines indicate the shape range of ch23.

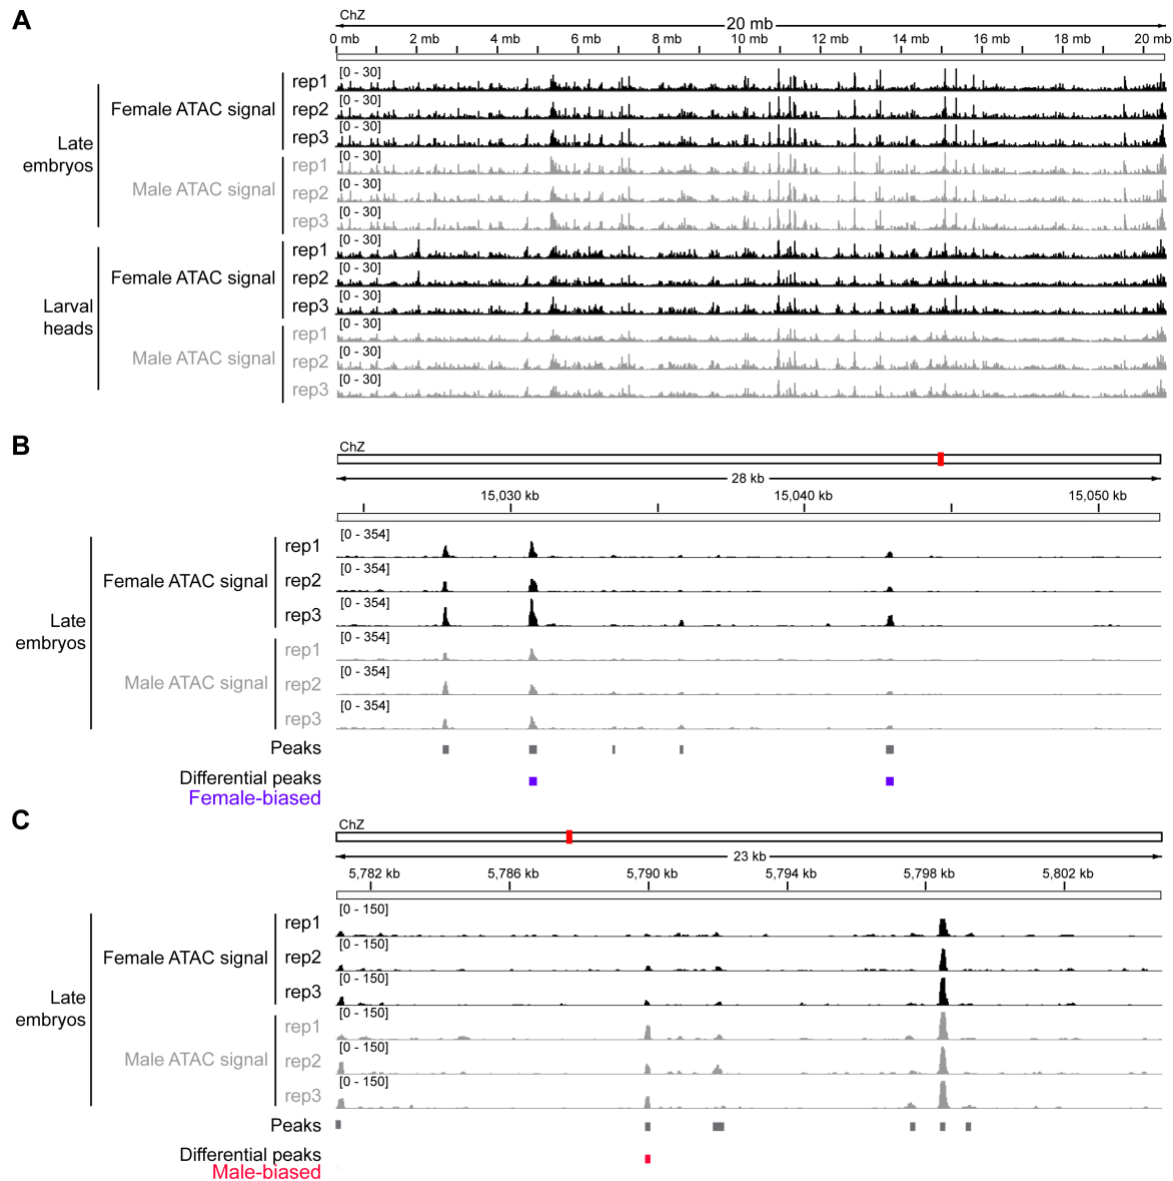

**Figure S4. ATAC-seq signal from male and female *B. mori*.**

**A)** ATAC-seq on the entire Z chromosome from male (ZZ) and female (ZW) late embryos (top) and larval heads (bottom). Tracks from three biological replicates are shown. Female tracks are shown in black. Male tracks are shown in gray.

**B-C)** Zoom of tracks showing a region on chZ (indicated by red box on chromosome schematic, above) with female-biased ATAC-seq (B) or male-biased ATAC-seq (C) in embryos. Peaks called in all replicates are shown in gray/black below the tracks. Female-biased peaks are indicated below in purple. Male-biased peaks are indicated below in red.

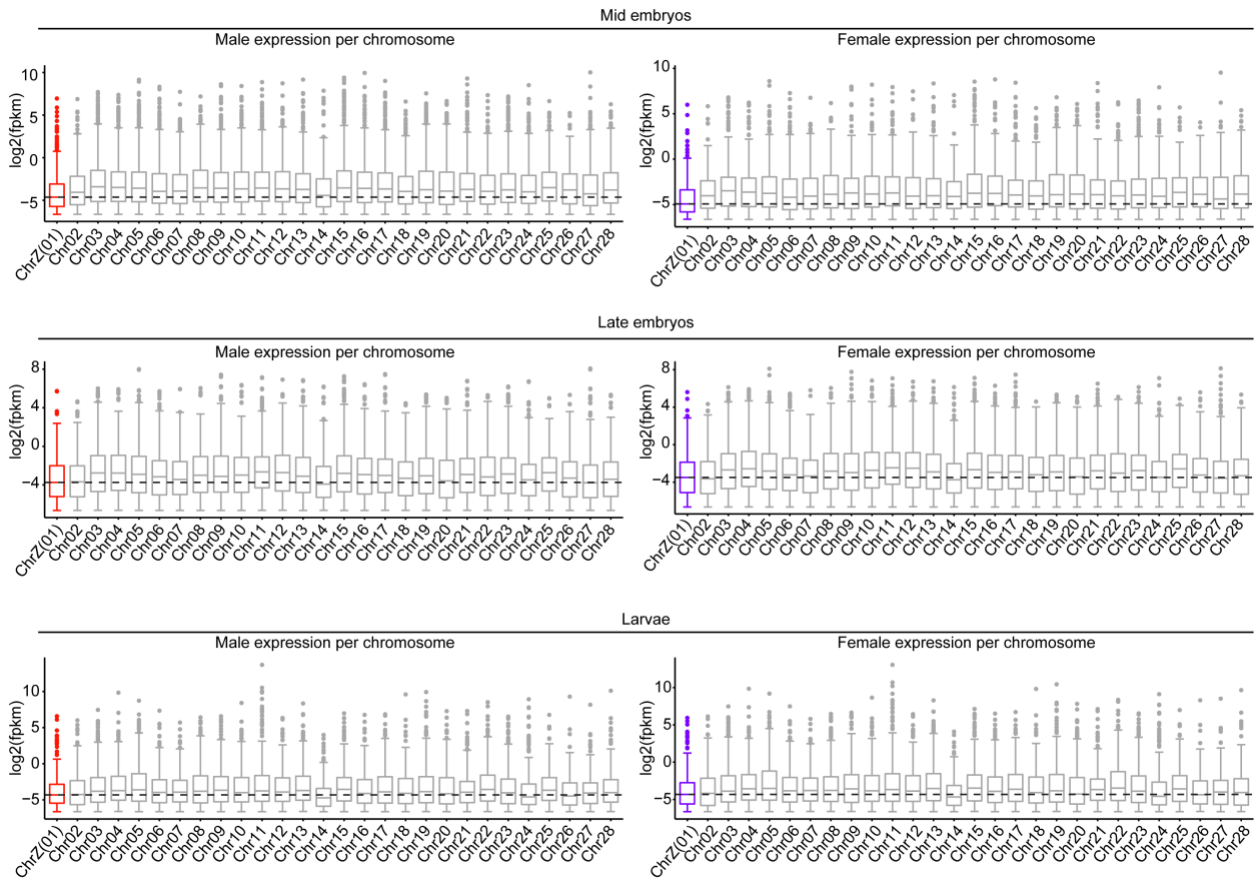

**Figure S5. Box plots of expression per chromosome per time point.**

Mid-lines represent median values. Black dashed line represents the median of chZ. Each dot represents an expressed gene (fpkm > 0.01). ChZ is shown in red (males) or purple (females). Autosomes are shown in gray.



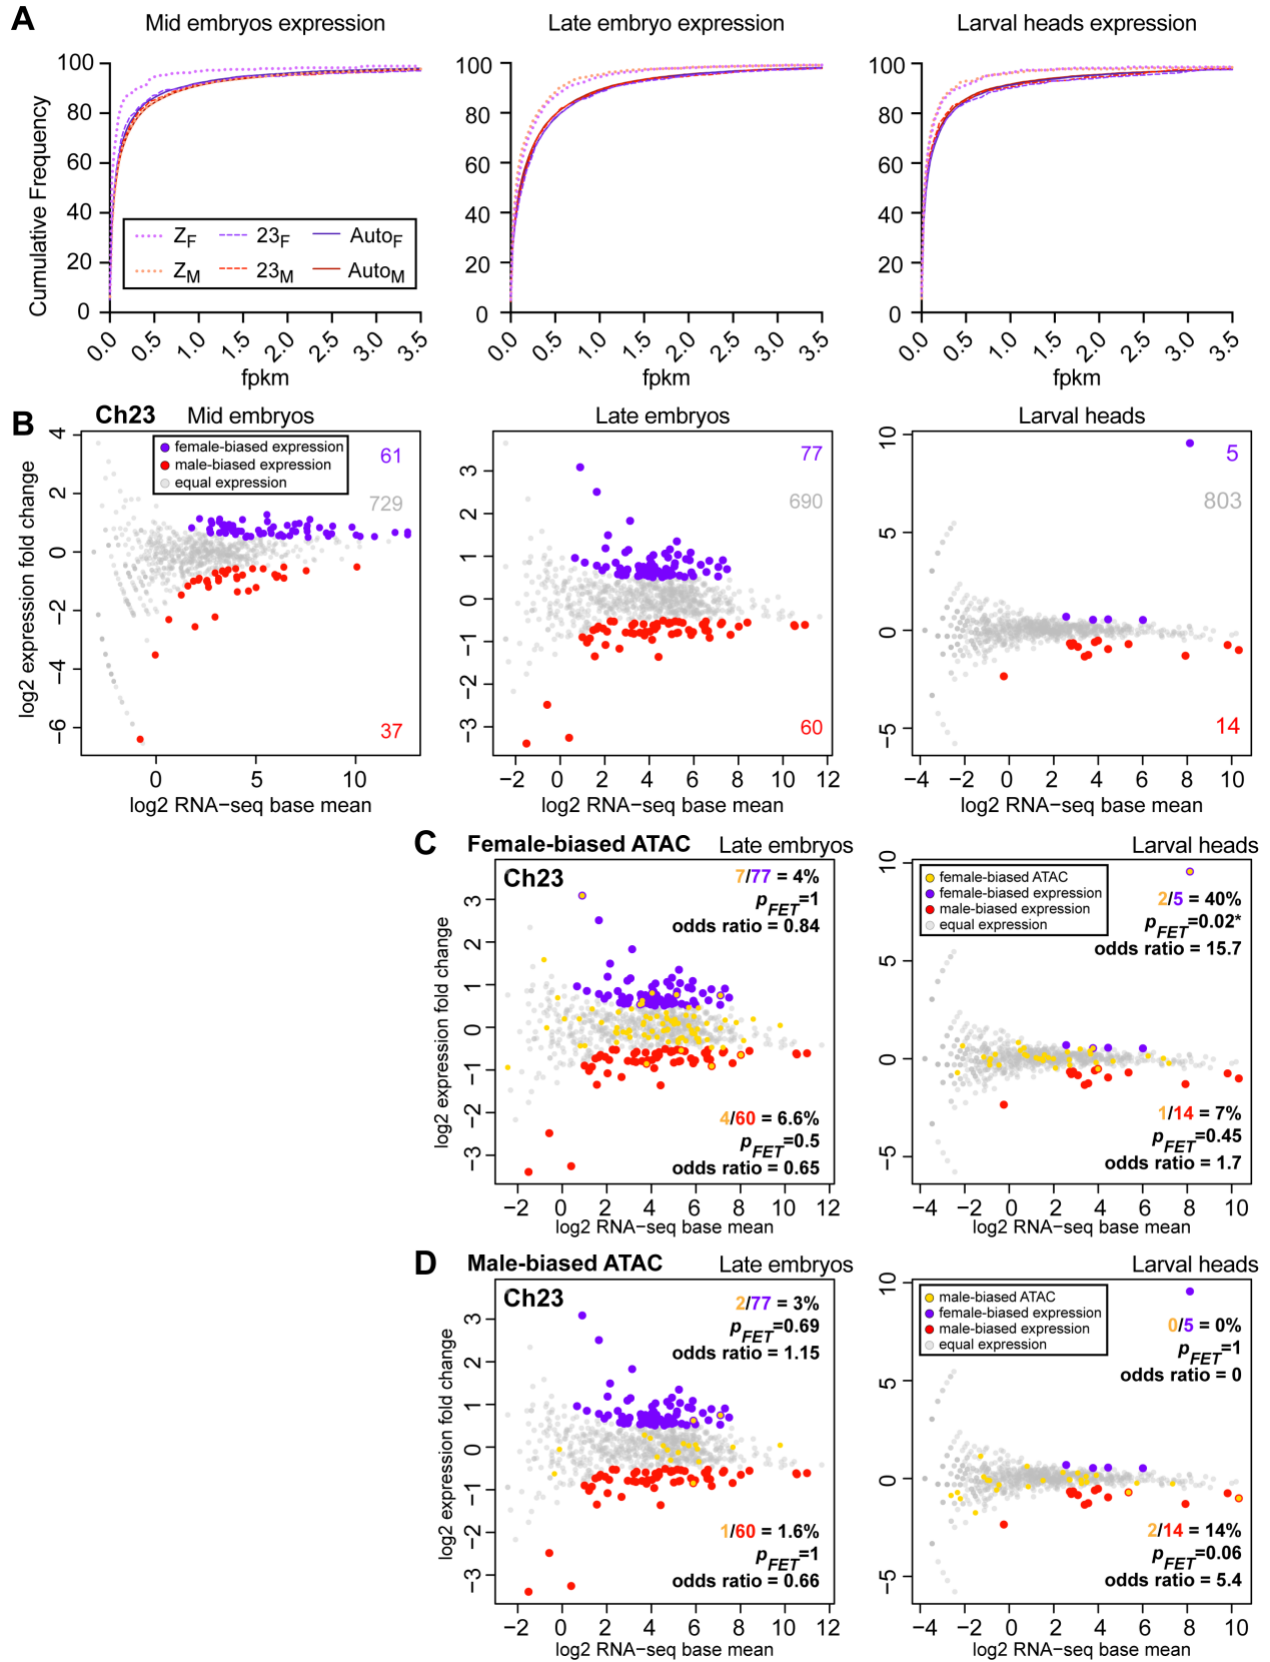

**Figure S6. RNA-seq on ch23 and all autosomes reveals approximately equal male- and female-biased genes.**

- A. Cumulative frequency histograms for expression (fpkm) in mid embryos (left), late embryos (middle), and larvae (right).
- B. MA plots showing differential expression on ch23 between male and female mid embryos (left), late embryos (middle), and larval heads (left). Loci with significantly differential expression ( $q < 0.01$  and fold-change  $> +/-0.5$ ) are shown in red (male-biased) or purple (female-biased). Numbers of differential or equally expressed loci are indicated to the right.
- C-D. MA plots shown in B with genes at or near differential ATAC-seq peaks indicated in Yellow for (C) female-biased ATAC-seq or (D) male-biased ATAC-seq. MA plots for late embryos are on the left, larval heads on the right. Two-sided Fisher's exact test was used to calculate p-values and odds ratios.

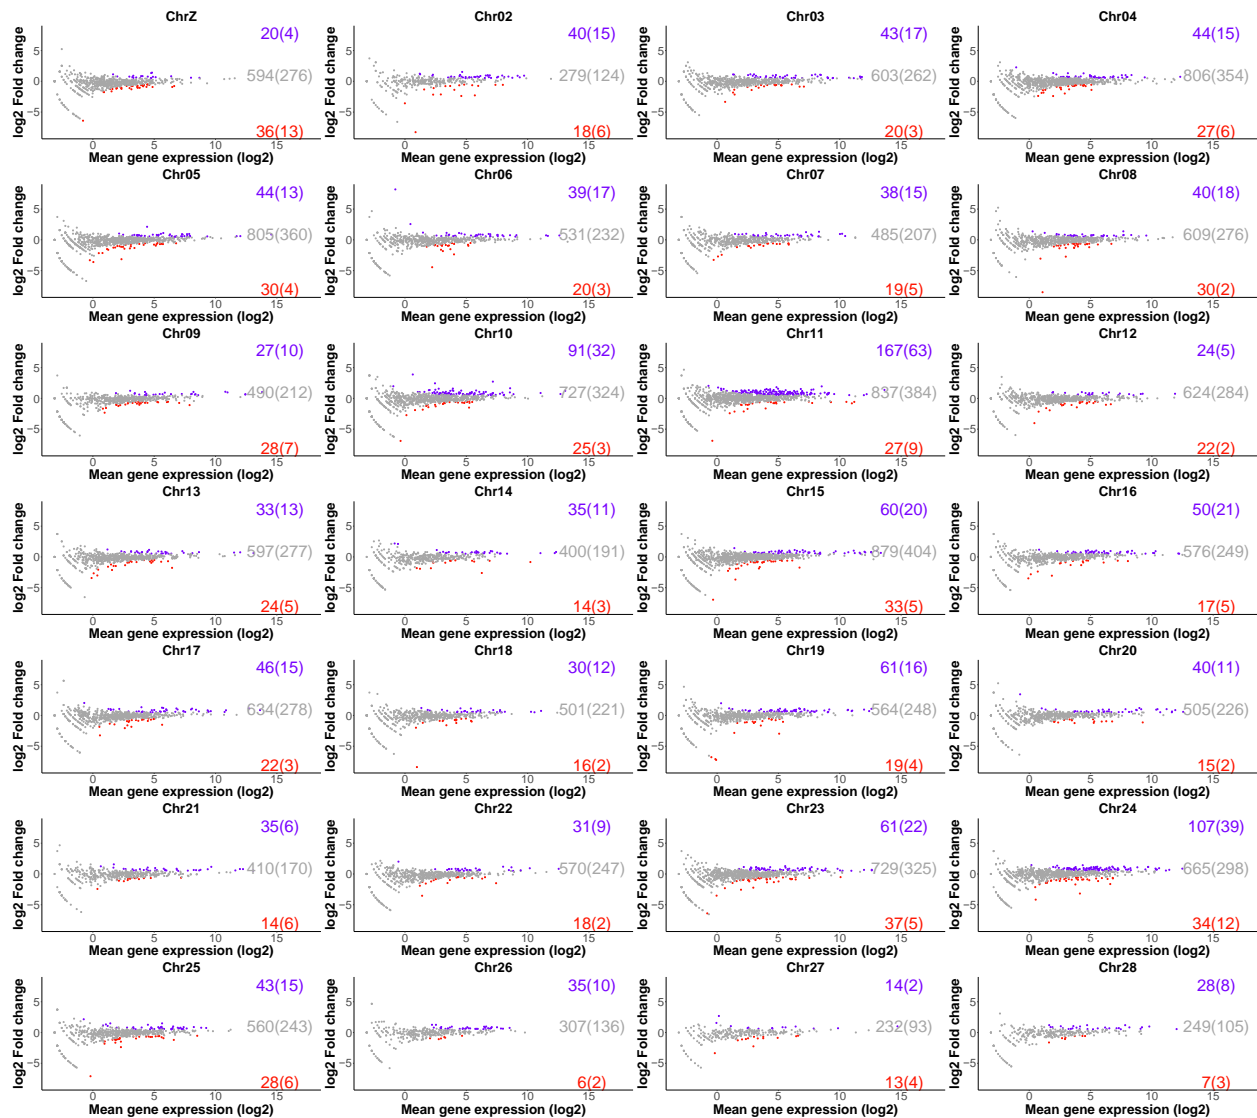

**Figure S7. Single chromosome MA plots for mid embryos.**

MA plots showing differential expression on all individual chromosomes between male and female mid embryos. Loci with significantly differential expression ( $FDR < 0.01$  and  $|\log_2 \text{fold change}| > 0.5$ ) are shown in red (male-biased) or purple (female-biased). Total numbers of differential or equally expressed loci are indicated to the right. Numbers inside parentheses indicate intergenic regions.

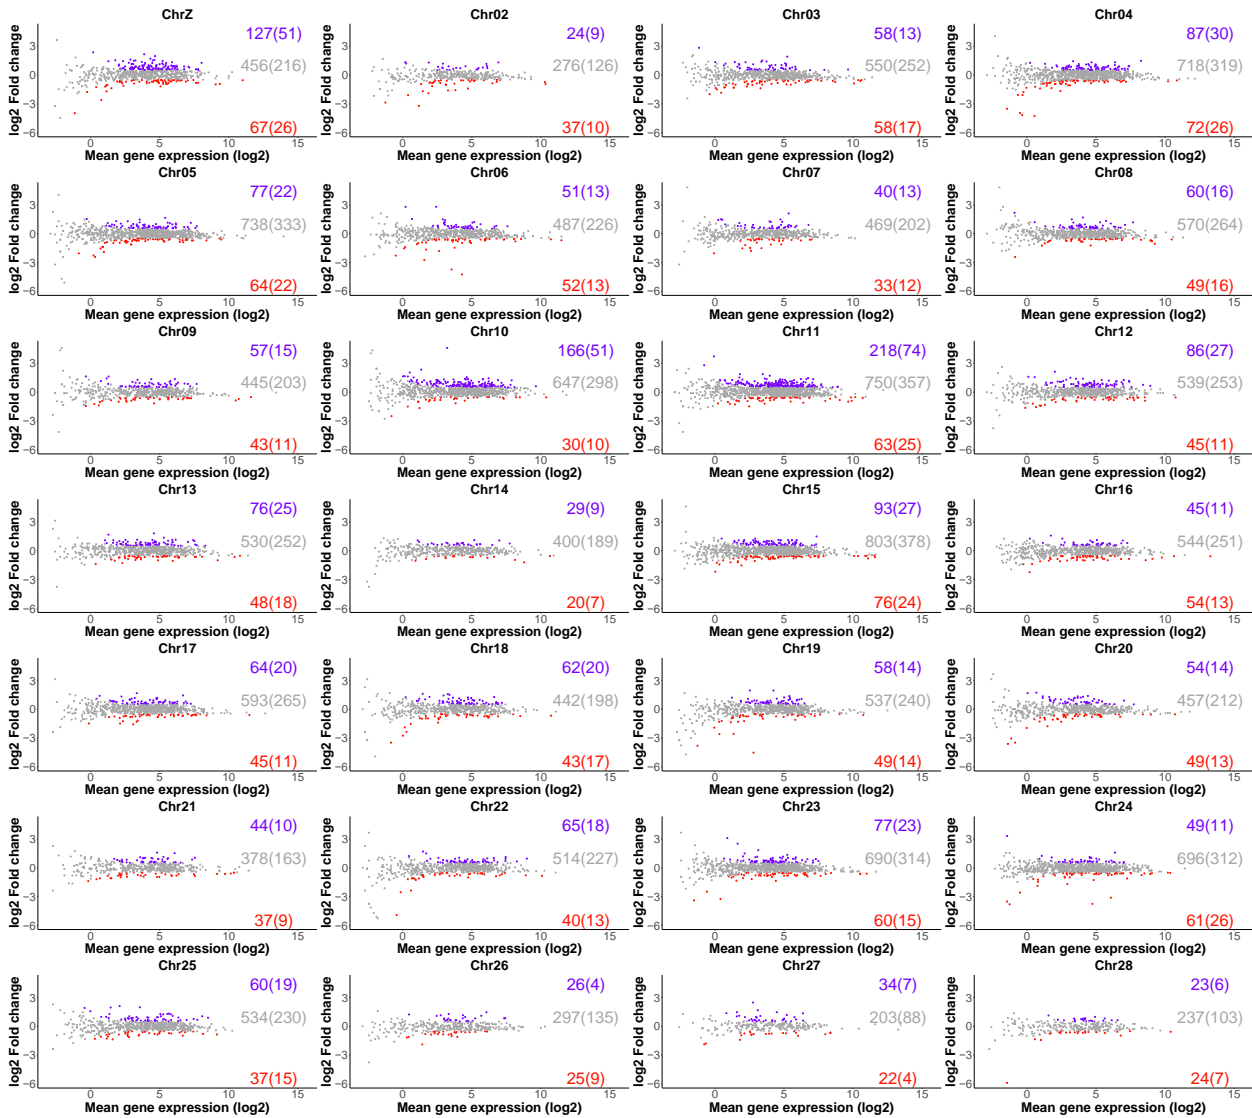

**Figure S8. Single chromosome MA plots for late embryos.**

MA plots showing differential expression on all individual chromosomes between male and female Late embryos. Loci with significantly differential expression ( $FDR < 0.01$  and  $|\log_2 \text{fold change}| > 0.5$ ) are shown in red (male-biased) or purple (female-biased). Total numbers of differential or equally expressed loci are indicated to the right. Numbers inside parentheses indicate intergenic regions.

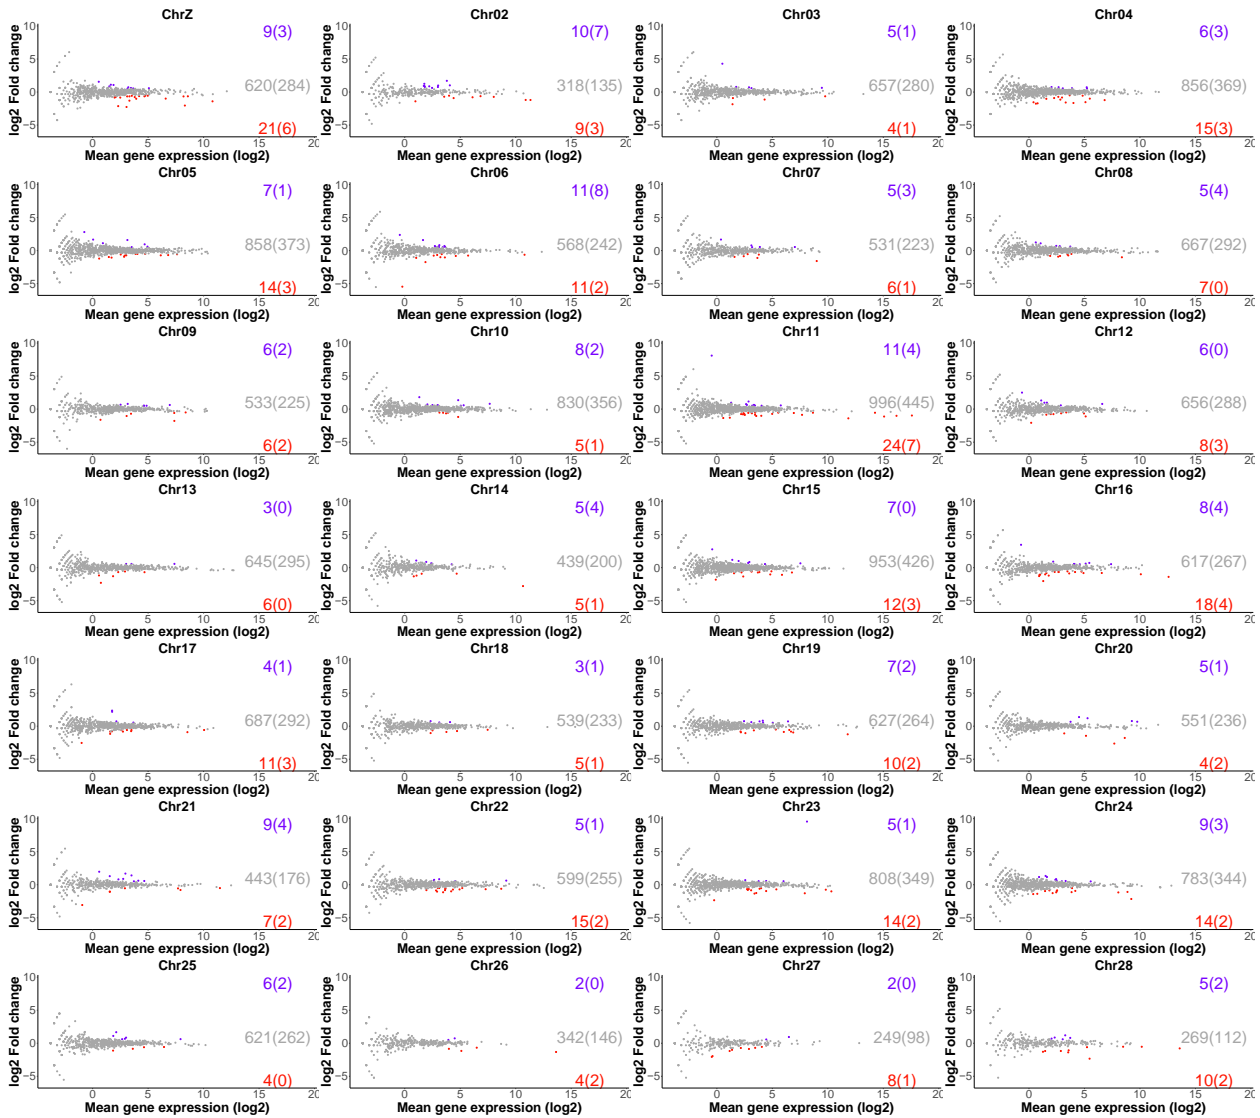

**Figure S9. Single chromosome MA plots for larval heads.**

MA plots showing differential expression on all individual chromosomes between male and female larval heads. Loci with significantly differential expression ( $FDR < 0.01$  and  $|\log_2 \text{fold change}| > 0.5$ ) are shown in red (male-biased) or purple (female-biased). Total numbers of differential or equally expressed loci are indicated to the right. Numbers inside parentheses indicate intergenic regions.

**A**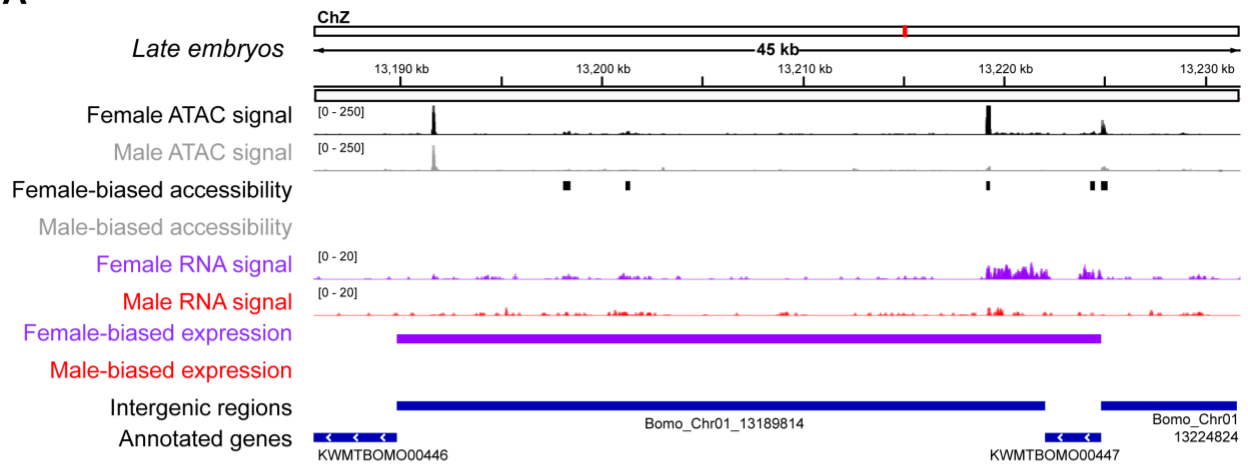**B**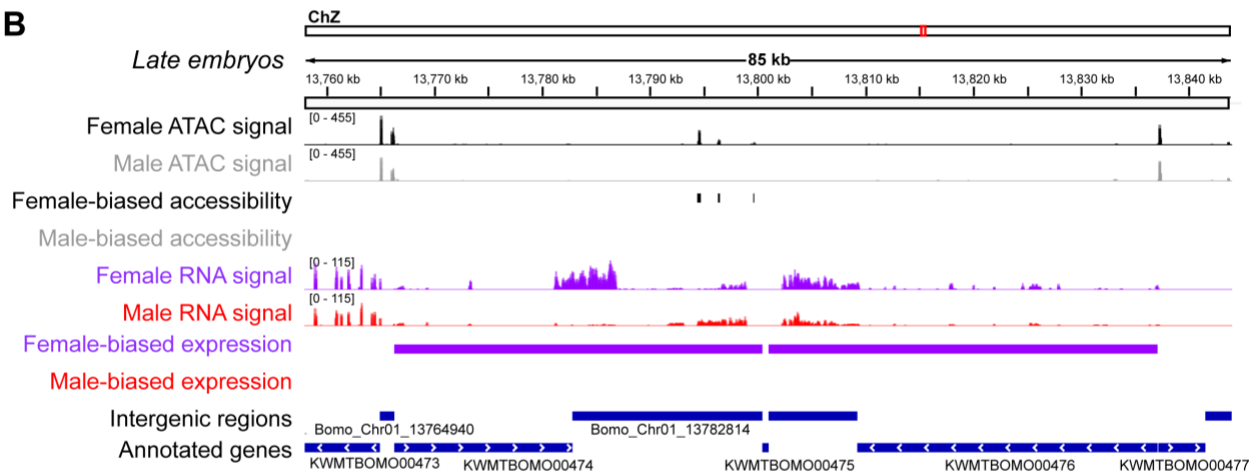**C**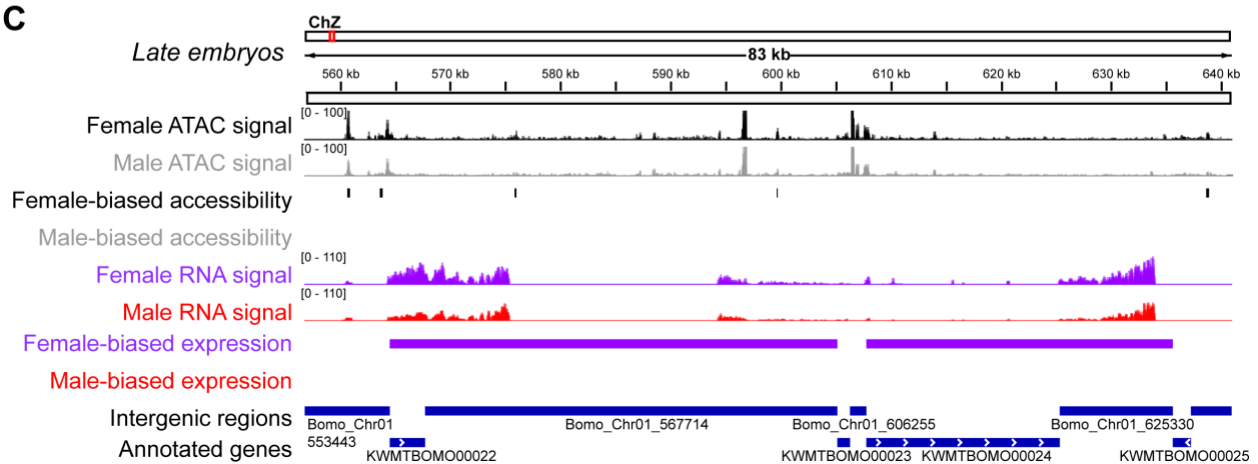

**Figure S10. Female-biased accessibility is associated with female-biased expression in late embryos.**

A-C. Genome browser screenshots of chZ in late embryos showing ATAC-seq in black and gray (female and male, respectively), RNA-seq in purple and red (female and male, respectively) along with published gene annotations (bottom) and intergenic regions (second from bottom) in blue. Differential ATAC-seq peaks are shown in black (female-biased) and gray (male-biased). Differentially expressed loci are shown in purple (female-biased) and red (male-biased).

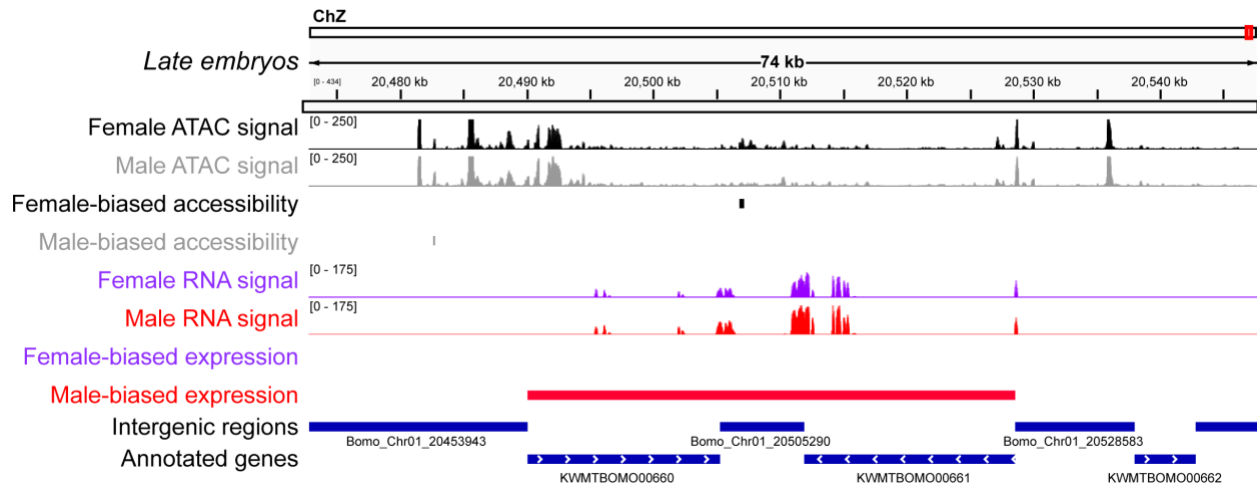

**Figure S11. Male-biased accessibility is not associated with male-biased expression in late embryos.**

Genome browser screenshot of chZ in late embryos (showing ATAC-seq in black and gray (female and male, respectively), RNA-seq in purple and red (female and male, respectively) along with published gene annotations (bottom) and intergenic regions (second from bottom) in blue. Differential ATAC-seq peaks are shown in black (female-biased) and gray (male-biased). Differentially expressed loci are shown in purple (female-biased) and red (male-biased).

## Supplemental Tables

**Table S1. Chromosome and chromosome paint information**

| Chrom. | Chromosome size (bp) | Size painted (bp) | Paint start | Paint stop | Density (probes/kb) | Total # of oligos | Gene density (genes per Mb) |
|--------|----------------------|-------------------|-------------|------------|---------------------|-------------------|-----------------------------|
| 4      | 18,737,234           | 18,639,239        | 282         | 18,639,521 | 1.5                 | 26,841            | 39.71                       |
| 7      | 13,944,894           | 13,868,845        | 35,931      | 13,904,776 | 3                   | 42,625            | 36.00                       |
| 15     | 18,440,292           | 18,354,755        | 21,089      | 18,375,844 | 1                   | 17,756            | 43.60                       |
| 16     | 14,337,292           | 14,275,583        | 27,737      | 14,303,320 | 1.5                 | 20,190            | 43.66                       |
| 17     | 16,840,672           | 16,806,551        | 9,415       | 16,815,966 | 1.5                 | 23,834            | 38.30                       |
| 23     | 21,465,692           | 21,339,065        | 123,188     | 21,462,253 | 1.5                 | 30,506            | 35.82                       |
| Z (1)  | 20,666,287           | 20,578,020        | 37,936      | 20,615,956 | 1.5                 | 29,784            | 32.18                       |

**Table S2. Stripe sub-library paint information**

| Chrom. | Tel1 size (Mb) | Mid size (Mb) | Tel2 size (Mb) | Density (probes/kb) |
|--------|----------------|---------------|----------------|---------------------|
| 7      | 2.77           | 2.76          | 2.77           | 3                   |
| 15     | 3.66           | 3.68          | 3.62           | 1                   |
| 16     | 2.84           | 2.84          | 2.84           | 1.5                 |
| 23     | 3.16           | 1.65          | 3.30           | 1.5                 |
| Z (1)  | 3.12           | 1.58          | 3.06           | 1.5                 |

**Table S3. Differentially expressed Z-linked genes and intergenic regions in late embryos**

| Female-biased expression      | Male-biased expression        |
|-------------------------------|-------------------------------|
| Bomo_Chrom1_10231768_10251279 | Bomo_Chrom1_10334568_10353388 |
| Bomo_Chrom1_10265998_10266902 | Bomo_Chrom1_11417998_11423958 |
| Bomo_Chrom1_10269488_10281672 | Bomo_Chrom1_13899609_13903630 |
| Bomo_Chrom1_10567168_10573044 | Bomo_Chrom1_14263038_14264848 |
| Bomo_Chrom1_10914049_10925807 | Bomo_Chrom1_15435166_15435442 |
| Bomo_Chrom1_11018177_11030129 | Bomo_Chrom1_16061069_16069509 |
| Bomo_Chrom1_11969591_11977059 | Bomo_Chrom1_17032456_17076840 |
| Bomo_Chrom1_12003226_12071853 | Bomo_Chrom1_17396912_17408872 |
| Bomo_Chrom1_12422168_12433748 | Bomo_Chrom1_18626741_18678058 |
| Bomo_Chrom1_12467587_12478148 | Bomo_Chrom1_20024276_20026864 |



|                              |                              |
|------------------------------|------------------------------|
| Bomo_Chr01_12788526_12879762 | Bomo_Chr01_20060295_20064403 |
| Bomo_Chr01_13189814_13222021 | Bomo_Chr01_20218200_20269653 |
| Bomo_Chr01_13252844_13259444 | Bomo_Chr01_20335893_20345266 |
| Bomo_Chr01_1333887_1334678   | Bomo_Chr01_20349319_20379382 |
| Bomo_Chr01_13782814_13800437 | Bomo_Chr01_20505290_20511932 |
| Bomo_Chr01_13801014_13809208 | Bomo_Chr01_20599483_20666287 |
| Bomo_Chr01_14124359_14143677 | Bomo_Chr01_3429803_3557390   |
| Bomo_Chr01_14417060_14425543 | Bomo_Chr01_454225_487675     |
| Bomo_Chr01_1469527_1490070   | Bomo_Chr01_5713711_5790723   |
| Bomo_Chr01_1510551_1519820   | Bomo_Chr01_5958396_5963212   |
| Bomo_Chr01_15417762_15425214 | Bomo_Chr01_6147892_6151386   |
| Bomo_Chr01_17356042_17363367 | Bomo_Chr01_6446320_6453988   |
| Bomo_Chr01_17415426_17427702 | Bomo_Chr01_71352_78817       |
| Bomo_Chr01_1775110_1791901   | Bomo_Chr01_7326344_7381173   |
| Bomo_Chr01_19363856_19372571 | Bomo_Chr01_8532965_8534205   |
| Bomo_Chr01_19471945_19487619 | Bomo_Chr01_9445867_9447037   |
| Bomo_Chr01_1958266_1964535   | KWMTBOMO00019                |
| Bomo_Chr01_19766154_19774511 | KWMTBOMO00020                |
| Bomo_Chr01_1991877_1996582   | KWMTBOMO00111                |
| Bomo_Chr01_1997246_2001181   | KWMTBOMO00122                |
| Bomo_Chr01_2307813_2315356   | KWMTBOMO00171                |
| Bomo_Chr01_2541009_2555579   | KWMTBOMO00184                |
| Bomo_Chr01_3107821_3128546   | KWMTBOMO00192                |
| Bomo_Chr01_4360131_4397238   | KWMTBOMO00221                |
| Bomo_Chr01_4784783_4794824   | KWMTBOMO00243                |
| Bomo_Chr01_4927123_4954325   | KWMTBOMO00254                |
| Bomo_Chr01_5047459_5065887   | KWMTBOMO00255                |
| Bomo_Chr01_5644852_5651469   | KWMTBOMO00262                |
| Bomo_Chr01_567714_605123     | KWMTBOMO00270                |
| Bomo_Chr01_6218332_6227133   | KWMTBOMO00293                |
| Bomo_Chr01_625330_635578     | KWMTBOMO00298                |
| Bomo_Chr01_7490369_7512340   | KWMTBOMO00302                |
| Bomo_Chr01_8464105_8474245   | KWMTBOMO00332                |
| Bomo_Chr01_8633205_8640243   | KWMTBOMO00333                |
| Bomo_Chr01_8779922_8786289   | KWMTBOMO00339                |
| Bomo_Chr01_8820845_8843412   | KWMTBOMO00380                |
| Bomo_Chr01_8925412_8950822   | KWMTBOMO00387                |
| Bomo_Chr01_9432317_9439662   | KWMTBOMO00390                |
| Bomo_Chr01_9745824_9756340   | KWMTBOMO00391                |

|                            |               |
|----------------------------|---------------|
| Bomo_Chr01_9811704_9818805 | KWMTBOMO00420 |
| Bomo_Chr01_9959680_9965054 | KWMTBOMO00421 |
| KWMTBOMO00022              | KWMTBOMO00458 |
| KWMTBOMO00024              | KWMTBOMO00479 |
| KWMTBOMO00051              | KWMTBOMO00494 |
| KWMTBOMO00057              | KWMTBOMO00521 |
| KWMTBOMO00060              | KWMTBOMO00530 |
| KWMTBOMO00061              | KWMTBOMO00531 |
| KWMTBOMO00064              | KWMTBOMO00542 |
| KWMTBOMO00065              | KWMTBOMO00543 |
| KWMTBOMO00067              | KWMTBOMO00583 |
| KWMTBOMO00068              | KWMTBOMO00585 |
| KWMTBOMO00079              | KWMTBOMO00592 |
| KWMTBOMO00086              | KWMTBOMO00614 |
| KWMTBOMO00104              | KWMTBOMO00644 |
| KWMTBOMO00135              | KWMTBOMO00650 |
| KWMTBOMO00155              | KWMTBOMO00660 |
| KWMTBOMO00157              | KWMTBOMO00661 |
| KWMTBOMO00158              |               |
| KWMTBOMO00160              |               |
| KWMTBOMO00168              |               |
| KWMTBOMO00177              |               |
| KWMTBOMO00178              |               |
| KWMTBOMO00179              |               |
| KWMTBOMO00181              |               |
| KWMTBOMO00186              |               |
| KWMTBOMO00190              |               |
| KWMTBOMO00240              |               |
| KWMTBOMO00242              |               |
| KWMTBOMO00249              |               |
| KWMTBOMO00264              |               |
| KWMTBOMO00273              |               |
| KWMTBOMO00274              |               |
| KWMTBOMO00281              |               |
| KWMTBOMO00290              |               |
| KWMTBOMO00300              |               |
| KWMTBOMO00301              |               |
| KWMTBOMO00303              |               |
| KWMTBOMO00306              |               |

|               |  |
|---------------|--|
| KWMTBOMO00308 |  |
| KWMTBOMO00314 |  |
| KWMTBOMO00319 |  |
| KWMTBOMO00321 |  |
| KWMTBOMO00327 |  |
| KWMTBOMO00328 |  |
| KWMTBOMO00331 |  |
| KWMTBOMO00336 |  |
| KWMTBOMO00337 |  |
| KWMTBOMO00352 |  |
| KWMTBOMO00353 |  |
| KWMTBOMO00363 |  |
| KWMTBOMO00364 |  |
| KWMTBOMO00366 |  |
| KWMTBOMO00382 |  |
| KWMTBOMO00407 |  |
| KWMTBOMO00411 |  |
| KWMTBOMO00425 |  |
| KWMTBOMO00426 |  |
| KWMTBOMO00435 |  |
| KWMTBOMO00447 |  |
| KWMTBOMO00455 |  |
| KWMTBOMO00460 |  |
| KWMTBOMO00465 |  |
| KWMTBOMO00474 |  |
| KWMTBOMO00476 |  |
| KWMTBOMO00495 |  |
| KWMTBOMO00507 |  |
| KWMTBOMO00535 |  |
| KWMTBOMO00537 |  |
| KWMTBOMO00539 |  |
| KWMTBOMO00557 |  |
| KWMTBOMO00582 |  |
| KWMTBOMO00588 |  |
| KWMTBOMO00621 |  |
| KWMTBOMO00623 |  |
| KWMTBOMO00633 |  |
| KWMTBOMO00639 |  |
| KWMTBOMO00640 |  |

**Table S4. Differentially expressed Z-linked genes and intergenic regions in larval heads**

| <b>Female-biased expression</b> | <b>Male-biased expression</b> |
|---------------------------------|-------------------------------|
| Bomo_Chr01_13439491_13448180    | Bomo_Chr01_18626741_18678058  |
| KWMTBOMO00501                   | KWMTBOMO00530                 |
| KWMTBOMO00650                   | Bomo_Chr01_18678943_18727908  |
| Bomo_Chr01_15773905_15796285    | KWMTBOMO00339                 |
| KWMTBOMO00222                   | KWMTBOMO00390                 |
| KWMTBOMO00435                   | Bomo_Chr01_8307450_8385610    |
| KWMTBOMO00021                   | KWMTBOMO00422                 |
| Bomo_Chr01_13782814_13800437    | Bomo_Chr01_71352_78817        |
| KWMTBOMO00474                   | Bomo_Chr01_8423403_8428229    |
|                                 | KWMTBOMO00661                 |
|                                 | KWMTBOMO00086                 |
|                                 | KWMTBOMO00224                 |
|                                 | KWMTBOMO00610                 |
|                                 | KWMTBOMO00496                 |
|                                 | KWMTBOMO00211                 |
|                                 | KWMTBOMO00543                 |
|                                 | KWMTBOMO00592                 |
|                                 | KWMTBOMO00391                 |
|                                 | KWMTBOMO00382                 |
|                                 | KWMTBOMO00091                 |
|                                 | Bomo_Chr01_545938_548702      |

## Extended Methods

### ***B. mori* embryonic and larval cell slide preparation**

Mid and late embryos were partially dechorionated in 50% bleach for 15 min at RT, followed by manual removal of the chorion and vitelline membrane with forceps in a glass dissecting dish containing RT Sf-900 media (Gibco). For mid embryos, cells were then harvested directly from the dissecting dish and settled on poly-L-lysine-treated glass slides for 30 min in media before fixing with 4% PFA in PBS. For late embryos, pre-larvae were manually dissected away from extra-embryonic tissue and cells were dissociated with papain and collagenase before settling on slides and fixing as above. For larval samples, heads from 5<sup>th</sup> instar larvae were collected by decapitation, and cells were dissociated using Papain and Collagenase. Single embryos or single larval heads were used for slides involving Z chromosome analyses, and the number of Z chromosomes was used to sex the embryos. Larvae were sexed during dissection based on gonad morphology.

### **Nuclear volume analyses across species**

L4 *C. elegans* (Bristol N2) were aged 24 h before harvesting. Whole worms were prepared and DAPI stained as previously described (1). Briefly, worms were fixed in 8% PFA in PBS for 1 h at RT, washed with PBS, permeabilized with 95% ethanol for 1 min, and then stained with DAPI.

Mouse p1 eyes were prepared as previously described (2). Briefly, eyes were dissected from p1 mice and fixed in 4% PFA in PBS for up to 4 h. Eyes were then soaked in 15% sucrose for 1-2 d (until the tissue sinks in solution). This was repeated with 30% sucrose. Eyes were then

immersed in OCT Tissue Freezing Medium (Leica) and frozen on dry ice. Slides were prepared by cryosectioning into 16  $\mu\text{m}$  slices using a Cryostat (Leica). Tissue slides were then fixed again with 4% PFA for 15 min before staining with DAPI and mounting with Prolong Diamond.

*Dictyostelium (D. discoideum)* were removed from their culture medium by centrifugation at 600  $\times g$  for 5 min, then resuspended in PBS. Cells were settled onto Poly-L lysine coated slides for 10 min before fixing for 15 min with 4% PFA in PBS. Slides were washed thrice with PBS and before DAPI staining and mounting.

For all species, including *Drosophila* and *Bombyx*, nuclear diameters were manually measured in ImageJ, and nuclear volumes were then calculated in Microsoft Excel.

### **Oligopaint multiplexing**

Whole chromosome paints were multiplexed as previously described (3, 4) to allow for amplification sub-chromosomal stripes. Chromosomes 7, 15, and 16 contain 5 sub-chromosomal stripes approximately 3 Mb each. Of these, stripes 1, 3, and 5 were labeled to generate the 3-stripe pattern (tel1, mid, and tel2, respectively). Chromosomes Z and 23 contain 13 sub-chromosomal stripes approximately 1.5 Mb each. For chZ and ch23, stripes 1,2 (combined = tel1), 7 (mid), and 12, 13 (combined = tel2) were labeled to generate the 3-stripe pattern.

### **Oligopaint DNA FISH in *B. mori* cells**

After slide preparation and fixation as described above, slides were washed 3x 5 min each in 0.1% Triton X-100 in PBS (PBS-T<sup>0.1%</sup>) at RT, then permeabilized with PBS-T<sup>0.5%</sup> for 15 min

at RT. Cells were subsequently pre-denatured using the following washes: 1x 5 min in 2xSSCT (0.3 M NaCl, 0.03 M sodium citrate, 0.1% Tween-20) at RT, 1x 5 min 2xSSCT/50% formamide at RT, 1x 2.5 min in 2xSSCT/50% formamide at 92°C, 1x 20 min at 60°C in 2xSSCT/50% formamide. Primary Oligopaint probes in hybridization buffer (10% dextran sulfate/2xSSCT/50% formamide/4% polyvinylsulfonic acid) were then added to slides, covered with 22x22 mm cover glass, and sealed before being denatured at 92°C for 2.5 min. Slides were then placed in a humidified chamber at 37°C and incubated 16-18 h. The next day, slides were washed as follows: 2xSSCT at 60°C for 15 min, 2xSSCT at RT for 15 min, 0.2xSSC at RT for 10 min. Secondary probes (10 pmol/25 µL) containing fluorophores were added to slides, resuspended in hybridization buffer as described above, and covered with 22x22 mm cover glass and sealed. Slides were incubated at 37°C in a humidified chamber for 2 h before repeating the above washes. Finally, all slides were stained with DAPI DNA stain in PBS for 5 min, followed by 2x 5 min washes in PBS- T<sup>0.1%</sup> before mounting in Prolong Diamond (Invitrogen). Slides were left to cure overnight at RT before sealing with nail polish.

### **RNA-seq analysis**

Raw RNA-seq data were downloaded from BioProjectID: PRJNA388026. Adaptors were detected by BBtools v38.82 (5). Low quality bases and adaptors were trimmed using trimgalore v0.6.5 (6). The filtered paired-end reads were mapped to an updated version of the Ensembl (2013) *Bombyx mori* (ASM15162v1) reference genome using bowtie v2.4.1 (7) with default parameters in paired-end mode. SAM/BAM conversions, sorting, indexing and filtering were performed with SAMtools v. 1.10 (8). Aligned reads in the bam files were counted using

subread featureCounts v2.0.1 (9) with default parameters. The GTF file was downloaded from Silkbase (2016 gene models). In addition to annotated genes, intergenic regions were analyzed to circumvent problems with annotation. Raw read counts were normalized by fpkm (Fragments Per Kilobase of transcript per Million mapped reads). All annotated genes were grouped into autosomal (A)- or Z-linked (Z) genes. Genes that were not expressed in any samples (raw fpkm < 0.01 in all samples) were removed from analyses. After filtering, the total gene number was 17,713. Significant female- or male-biased expression was defined as FDR < 0.01 and  $|\log_2 \text{fold change}| > 0.5$  using edgeR (10). For direct comparisons of chZ to autosomes (such as Figure 6D-E), all genes with fpkm < 0.01 were removed from individual samples, leaving only the expressed genes present in each data set. Median fpkm values of genes on Z and autosomes were used to compute Z:A ratios. Z-linked genes and intergenes with significantly sex-biased expression can be found in Tables S3 and S4.

### **ATAC-seq sample preparation and data analysis**

ATAC-seq was performed using the ATAC-seq Kit from Active Motif (cat#53150) according to the manufacturer's instructions. For embryos, 16 single embryos were isolated and dissociated as described above. Then 10  $\mu\text{L}$  of cells were harvested, fixed to slides, and subjected to DNA FISH with chZ paint. Embryos were sexed based on the number of chZ foci present on slides, and the remaining cells were used to generate ATAC-seq libraries. Tn5-tagmented chromatin from two male or two female embryos was then pooled for library preparation, creating a total of 3 male and 3 female biological replicates (two embryos per library replicate). For larvae, heads were harvested by dissection, and larvae were sexed based



on internal gonad morphology. ATAC-seq libraries were generated with individual larval samples (one larva per replicate). Libraries were double size-selected with AMPure XP beads (Beckman Coulter; 0.6× volume followed by 1.2× volume).

ATAC-seq libraries were sequenced using the NovaSeq 6000 SP, PE 150bp with 300 cycles (Illumina) at the NHLBI Sequencing and Genomics core and analyzed as previously described (11). Sequencing reads were trimmed for adapters with cutadapt (v2.3) and aligned to an updated version of the Ensembl (2013) *Bombyx mori* (ASM15162v1) reference genome with bowtie2 (v2.3.5; --very-sensitive, paired-end mode; (7)). For proper normalization, reads from ch Z and autosomes were analyzed separately. Reads were depleted of multi-mapped reads with samtools (v1.9; (8)) and PCR duplicates with picard (MarkDuplicates REMOVE\_DUPLICATES=true) were further selected for inserts < 150 bp to perform peak calling with MACS2 (v2.2.6; pair-end mode -f BAMPE; (12)). Differential accessibility was called with the R package DiffBind v2.6.6 ((13); edgeR,  $p < 0.05$ ) and associated with the closest gene to generate MA plots integrating RNA-seq data. The  $p$  values of Fisher's exact tests were calculated for expressed genes (fpm > 0.01) with R v3.6.1 and reported as two-tailed values with \*\*\* $p < 0.001$ , \*\* $p < 0.01$  and \* $p < 0.05$ . Heatmaps were generated with deepTools (v3.5.1; (14)). The ATAC-seq data have been deposited in the Gene Expression Omnibus database under accession number GSE191164.

## Supplemental References

1. S. Shaham, *Methods in cell biology* (WormBook, 2006) (December 2, 2021).
2. H. Léger, E. Santana, W. A. Beltran, F. C. Luca, Preparation of Mouse Retinal Cryo-sections for Immunohistochemistry. *J Vis Exp* (2019) <https://doi.org/10.3791/59683>.
3. B. D. Fields, S. C. Nguyen, G. Nir, S. Kennedy, A multiplexed DNA FISH strategy for assessing genome architecture in *Caenorhabditis elegans*. *eLife* **8** (2019).
4. L. F. Rosin, J. G. Jr, I. A. Drinnenberg, E. P. Lei, Oligopaint DNA FISH reveals telomere-based meiotic pairing dynamics in the silkworm, *Bombyx mori*. *PLoS Genetics* **17**, e1009700 (2021).
5. B. Bushnell, J. Rood, E. Singer, BBMerge - Accurate paired shotgun read merging via overlap. *PLoS One* **12**, e0185056 (2017).
6. F. Krueger, F. James, P. Ewels, E. Afyounian, B. Schuster-Boeckler, *FelixKrueger/TrimGalore: v0.6.7 - DOI via Zenodo* (Zenodo, 2021) <https://doi.org/10.5281/zenodo.5127899> (December 12, 2021).
7. B. Langmead, S. Salzberg, Fast gapped-read alignment with Bowtie 2 | Nature Methods. *Nature Methods* (2012) <https://doi.org/10.1038/nmeth.1923> (April 19, 2021).
8. H. Li, *et al.*, The Sequence Alignment/Map format and SAMtools. *Bioinformatics* **25**, 2078–2079 (2009).
9. Y. Liao, G. K. Smyth, W. Shi, featureCounts: an efficient general purpose program for assigning sequence reads to genomic features. *Bioinformatics* **30**, 923–930 (2014).
10. M. D. Robinson, D. J. McCarthy, G. K. Smyth, edgeR: a Bioconductor package for differential expression analysis of digital gene expression data. *Bioinformatics* **26**, 139–140 (2010).
11. D. Chen, C. E. McManus, B. Radmanesh, L. H. Matzat, E. P. Lei, Temporal inhibition of chromatin looping and enhancer accessibility during neuronal remodeling. *Nat Commun* **12**, 6366 (2021).
12. Y. Zhang, *et al.*, Model-based Analysis of ChIP-Seq (MACS). *Genome Biology* **9**, R137 (2008).
13. R. Stark, G. Brown, DiffBind: Differential binding analysis of ChIP-Seq peak data. 75.
14. F. Ramírez, F. Dündar, S. Diehl, B. A. Grüning, T. Manke, deepTools: a flexible platform for exploring deep-sequencing data. *Nucleic Acids Res* **42**, W187-191 (2014).
